# Supplementary material for: A new method to identifying optimal adjustment strategy when the car cockpit is uncomfortable: optimal state distance method
Source: PeerJ Comput Sci. 2023 Apr 6;9:e1324. doi: 10.7717/peerj-cs.1324 (PMC10280415; doi:10.7717/peerj-cs.1324)
Supplement: Supplemental Information 1 [file peerj-cs-09-1324-s001.xlsx]

## Sheet: Sheet1
Acoustic environment dB(A)	comprehensive evaluation value
52.7	8.53333
60.2	7.73333
65.5	7.13333
69.9	6.86667
74.3	6
79.6	4.86667
79.7	4.46667
89.4	3.21

## Sheet: Sheet2
Optical environment lx	comprehensive evaluation value
53.8	1.8
101.7	3.5
153.2	4.8
202.5	6.2
250.7	7.5
302.1	8.4
350.8	9
403.5	9.4
452.8	9.5
505.6	9.2
598.8	8.3
700.6	7.2
805.3	5.4
1002.8	3.6

## Sheet: Sheet3
Thermal environment ℃	comprehensive evaluation value
30.9	7.1
29.2	8.4
27.2	8.9
25.9	9.7
24.8	9.8
24.1	9.5
23.1	9.3
21.8	8.9
19.8	8.1
17.1	6.8
