# Supplementary material for: A new method to identifying optimal adjustment strategy when the car cockpit is uncomfortable: optimal state distance method
Source: PeerJ Comput Sci. 2023 Apr 6;9:e1324. doi: 10.7717/peerj-cs.1324 (PMC10280415; doi:10.7717/peerj-cs.1324)
Supplement: Supplemental Information 2 [file peerj-cs-09-1324-s002.xlsx]

## Sheet: Sheet1
Number	Acoustic environment dB(A)	Optical environment lx	Thermal environment ℃	Acoustic environment comfort evaluation value	Optical environment comfort evaluation value	Thermal environment comfort evaluation value	Model comprehensive evaluation value
1	67.2	454.3	15.3	6.715	9.19086	5.03284	6.52478
2	69.5	1029.2	34.4	6.37	1.72377	4.36816	4.13269
3	80.3	999.6	33.8	4.75	2.6086	4.98844	4.20991
4	75.4	1008.7	25.3	5.485	2.34235	9.59884	5.48594
5	72.4	650.5	36.3	5.935	8.94584	2.14744	4.56964
6	68.2	868.5	36.3	6.565	5.87444	2.14744	4.32786
7	88.2	880.5	21.2	3.565	5.61981	9.03304	5.48079
8	76.2	905.4	34.5	5.365	5.06298	4.261	4.88384
9	69.1	582.7	19.5	6.43	9.30038	8.266	7.64288
10	76.5	654.3	36	5.32	8.91754	2.524	4.61499
11	82.4	425.2	32.6	4.435	9.02395	6.11236	5.84265
12	82.8	774.2	36.7	4.375	7.56465	1.63024	3.51253
13	84.7	480.7	20.6	4.09	9.29685	8.79796	6.45914
14	82.2	880.3	36.8	4.465	5.62413	1.49824	3.21286
15	69	947.4	25.5	6.445	4.03663	9.58	6.64869
16	66.5	977.5	26	6.82	3.23381	9.514	6.45432
17	71.2	111.7	27.8	6.115	3.89632	9.05284	6.32429
18	67.6	985.1	18.8	6.655	3.02222	7.85944	5.8828
19	59.6	939.9	26.8	7.855	4.22793	9.35224	7.24088
20	79.5	999.3	30	4.87	2.61728	8.014	5.02592
21	64.6	927.9	31.2	7.105	4.52675	7.22704	6.44353
22	60.7	1031.2	34.5	7.69	1.66202	4.261	4.39708
23	85.6	1076.8	12	3.955	0.186955	1.156	1.27449
24	86.2	1024.2	36.6	3.865	1.87705	1.76116	2.48617
25	82.3	998.2	36.9	4.45	2.6491	1.36516	2.61179
26	77.4	344.9	36.4	5.185	8.29106	2.01976	4.15269
27	77.2	674.2	34.8	5.215	8.75469	3.93304	5.32252
28	69.3	878.4	36.9	6.4	5.66502	1.36516	3.62365
29	74.9	896.7	36.2	5.56	5.2619	2.27404	4.01489
30	69.3	663.6	33.9	6.4	8.84449	4.88776	6.27363
31	70.2	669.9	33.9	6.265	8.79195	4.88776	6.20919
32	56.9	532.1	30.4	8.26	9.37926	7.76896	8.32448
33	76.9	827	31.4	5.26	6.6862	7.08076	6.16784
34	76.5	643.4	27.2	5.32	8.99633	9.24544	7.28438
35	68.3	487.3	23.1	6.55	9.3166	9.52096	8.09634
36	66.7	618.2	22.9	6.79	9.15029	9.48796	8.17572
37	88.9	648.9	33	3.46	8.95749	5.755	5.14554
38	64.8	525.4	26.4	7.075	9.3778	9.44176	8.35097
39	65.2	549.4	27.2	7.015	9.37015	9.24544	8.25863
40	67.4	775.3	28.4	6.685	7.54811	8.82136	7.575
41	80.9	172.3	18.2	4.66	5.36259	7.46884	5.67697
42	82.4	444	33.2	4.435	9.13778	5.56984	5.67197
43	56.9	532.1	28.4	8.26	9.37926	8.82136	8.70298
44	84.2	663.9	31.9	4.165	8.84204	6.69616	5.84769
45	56.9	532.1	28.4	8.26	9.37926	8.82136	8.70298
46	66.5	789.3	32.5	6.82	7.33107	6.199	6.70642
47	76.4	990.5	20.3	5.335	2.8697	8.66584	5.48192
48	65.8	543.5	37.2	6.925	9.37534	0.95944	3.7174
49	88.2	880.5	21.2	3.565	5.61981	9.03304	5.48079
50	66.5	996.8	30.7	6.82	2.68948	7.57384	5.71181
51	56.5	873.3	19.5	8.32	5.77366	8.266	7.63201
52	77.6	518.2	34.3	5.155	9.37313	4.47424	5.62887
53	76	674.6	27.9	5.395	8.75116	9.01696	7.21743
54	70.6	800.4	29.7	6.205	7.15036	8.18644	7.06367
55	68.4	780	26.7	6.535	7.4766	9.37624	7.6483
56	80.2	487.8	27.2	4.765	9.31799	9.24544	7.01141
57	69.1	582.7	19.5	6.43	9.30038	8.266	7.64288
58	73.5	579.8	33	5.77	9.30919	5.755	6.43516
59	56.7	872.3	21.8	8.29	5.79477	9.22924	7.92683
60	65.3	518.9	26.4	7	9.37373	9.44176	8.31284
61	82.4	425.2	32.6	4.435	9.02395	6.11236	5.84265
62	59.7	939.6	22.7	7.84	4.23551	9.45064	7.26461
63	77.2	582.6	36.4	5.215	9.30069	2.01976	4.27425
64	56.4	997.7	33.4	8.335	2.66354	5.38036	5.50072
65	66.7	433.7	19	6.79	9.07813	7.981	7.68147
66	77.7	999.3	33.6	5.14	2.61728	5.18656	4.41487
67	78.1	498.5	25.8	5.08	9.34393	9.54364	7.2876
68	63.3	180.2	22.2	7.3	5.53697	9.33844	7.46697
69	76.8	330.7	19.3	5.275	8.11986	8.15524	6.78473
70	84.7	480.7	20.6	4.09	9.29685	8.79796	6.45914
71	90	555.3	21.5	3.295	9.3628	9.136	5.9867
72	87.6	678.6	22.3	3.655	8.71536	9.36304	6.20404
73	65.5	540.5	23.7	6.97	9.37715	9.59404	8.34516
74	69.4	599.6	33.9	6.385	9.23868	4.88776	6.33062
75	69	947.4	25.5	6.445	4.03663	9.58	6.64869
76	66.5	977.5	26	6.82	3.23381	9.514	6.45432
77	71.2	111.7	27.8	6.115	3.89632	9.05284	6.32429
78	63.7	334.2	28.4	7.24	8.16322	8.82136	7.97546
79	61.8	323.1	29.1	7.525	8.0231	8.50216	7.97015
80	76.5	656.9	30.1	5.32	8.89765	7.95436	6.89331
81	77.3	854	31.6	5.2	6.1702	6.93016	5.98068
82	67.2	454.3	15.3	6.715	9.19086	5.03284	6.52478
83	64.1	675.4	32	7.18	8.74408	6.616	7.30088
84	65.6	856.7	27.3	6.955	6.11612	9.21604	7.45152
85	88.3	645.4	28.5	3.55	8.98242	8.779	6.03368
86	76.3	450.3	36.6	5.35	9.17103	1.76116	4.10482
87	84.4	650.5	36.3	4.135	8.94584	2.14744	3.92613
88	70.5	880.6	21.8	6.22	5.61765	9.22924	6.97586
89	67.6	985.1	18.8	6.655	3.02222	7.85944	5.8828
90	68.2	674.6	23.5	6.565	8.75116	9.574	8.0038

## Sheet: Sheet2
Number	Acoustic environment dB(A)	Optical environment lx	Thermal environment ℃	Acoustic environment comfort evaluation value	Optical environment comfort evaluation value	Thermal environment comfort evaluation value	Model comprehensive evaluation value	Adjustment strategy identified by experts	Calculate OS distance						Adjustment strategy identified by OSD
1	67.2	454.3	15.3	6.715	9.19086	5.03284	6.52478	3	0.185648	0.0339075	0.212595	0.0501249	0.0118676	0.0807859	3
2	69.5	1029.2	34.4	6.37	1.72377	4.36816	4.13269	2	0.210473	0.28539	0.237868	0.0568276	0.0998865	0.0903898	2
3	80.3	999.6	33.8	4.75	2.6086	4.98844	4.20991	2	0.327042	0.261598	0.214746	0.0883014	0.0915594	0.0816035	2
4	75.4	1008.7	25.3	5.485	2.34235	9.59884	5.48594	2	0.274154	0.268795	0.0114882	0.0740216	0.0940781	0.00436551	2
5	72.4	650.5	36.3	5.935	8.94584	2.14744	4.56964	3	0.241774	0.0523208	0.319966	0.0652789	0.0183123	0.121587	3
6	68.2	868.5	36.3	6.565	5.87444	2.14744	4.32786	3	0.196441	0.168968	0.319966	0.0530391	0.0591389	0.121587	3
7	88.2	880.5	21.2	3.565	5.61981	9.03304	5.48079	1	0.412311	0.176632	0.0519101	0.111324	0.0618212	0.0197258	1
8	76.2	905.4	34.5	5.365	5.06298	4.261	4.88384	3	0.282789	0.193036	0.241851	0.076353	0.0675625	0.0919035	3
9	69.1	582.7	19.5	6.43	9.30038	8.266	7.64288	1	0.206155	0.0220038	0.086964	0.0556619	0.00770133	0.0330463	1
10	76.5	654.3	36	5.32	8.91754	2.524	4.61499	3	0.286027	0.0540715	0.306098	0.0772273	0.018925	0.116317	3
11	82.4	425.2	32.6	4.435	9.02395	6.11236	5.84265	1	0.349709	0.0469867	0.172455	0.0944213	0.0164453	0.0655329	1
12	82.8	774.2	36.7	4.375	7.56465	1.63024	3.51253	3	0.354026	0.113771	0.33899	0.095587	0.03982	0.128816	3
13	84.7	480.7	20.6	4.09	9.29685	8.79796	6.45914	1	0.374534	0.0222699	0.0634079	0.101124	0.00779446	0.024095	1
14	82.2	880.3	36.8	4.465	5.62413	1.49824	3.21286	3	0.34755	0.176503	0.343841	0.0938385	0.0617761	0.13066	3
15	69	947.4	25.5	6.445	4.03663	9.58	6.64869	2	0.205076	0.222298	0.0144054	0.0553705	0.0778042	0.00547407	2
16	66.5	977.5	26	6.82	3.23381	9.514	6.45432	2	0.178092	0.244552	0.0218463	0.0480849	0.0855933	0.00830161	2
17	71.2	111.7	27.8	6.115	3.89632	9.05284	6.32429	2	0.228822	0.226042	0.0516131	0.0617818	0.0791148	0.019613	2
18	67.6	985.1	18.8	6.655	3.02222	7.85944	5.8828	2	0.189965	0.250346	0.103805	0.0512906	0.0876211	0.0394458	2
19	59.6	939.9	26.8	7.855	4.22793	9.35224	7.24088	2	0.103617	0.216922	0.0343834	0.0279767	0.0759226	0.0130657	2
20	79.5	999.3	30	4.87	2.61728	8.014	5.02592	2	0.318407	0.261363	0.0981153	0.08597	0.091477	0.0372838	2
21	64.6	927.9	31.2	7.105	4.52675	7.22704	6.44353	2	0.157585	0.208458	0.129589	0.0425479	0.0729601	0.0492439	2
22	60.7	1031.2	34.5	7.69	1.66202	4.261	4.39708	2	0.11549	0.287038	0.241851	0.0311823	0.100463	0.0919035	2
23	85.6	1076.8	12	3.955	0.186955	1.156	1.27449	3	0.384248	0.326019	0.356013	0.103747	0.114107	0.135285	3
24	86.2	1024.2	36.6	3.865	1.87705	1.76116	2.48617	1	0.390724	0.281293	0.334177	0.105495	0.0984525	0.126987	3
25	82.3	998.2	36.9	4.45	2.6491	1.36516	2.61179	3	0.348629	0.2605	0.348731	0.0941299	0.0911752	0.132518	3
26	77.4	344.9	36.4	5.185	8.29106	2.01976	4.15269	3	0.295741	0.0851753	0.324665	0.0798501	0.0298114	0.123373	3
27	77.2	674.2	34.8	5.215	8.75469	3.93304	5.32252	3	0.293582	0.0633551	0.254025	0.0792673	0.0221743	0.0965296	3
28	69.3	878.4	36.9	6.4	5.66502	1.36516	3.62365	3	0.208314	0.17528	0.348731	0.0562448	0.0613479	0.132518	3
29	74.9	896.7	36.2	5.56	5.2619	2.27404	4.01489	3	0.268758	0.187226	0.315306	0.0725645	0.0655292	0.119816	3
30	69.3	663.6	33.9	6.4	8.84449	4.88776	6.27363	3	0.208314	0.0583852	0.218507	0.0562448	0.0204348	0.0830328	3
31	70.2	669.9	33.9	6.265	8.79195	4.88776	6.20919	3	0.218028	0.0613319	0.218507	0.0588676	0.0214662	0.0830328	3
32	76.9	827	31.4	5.26	6.6862	7.08076	6.16784	1	0.290344	0.143619	0.135298	0.078393	0.0502667	0.0514133	1
33	76.5	643.4	27.2	5.32	8.99633	9.24544	7.28438	1	0.286027	0.0490674	0.0410376	0.0772273	0.0171736	0.0155943	1
34	67.4	775.3	28.4	6.685	7.54811	8.82136	7.575	1	0.187806	0.114368	0.0630064	0.0507077	0.0400288	0.0239424	1
35	80.9	172.3	18.2	4.66	5.36259	7.46884	5.67697	2	0.333518	0.184077	0.119474	0.09005	0.0644268	0.0454001	1
36	82.4	444	33.2	4.435	9.13778	5.56984	5.67197	1	0.349709	0.0385022	0.192947	0.0944213	0.0134758	0.07332	1
37	88.9	648.9	33	3.46	8.95749	5.755	5.14554	1	0.419866	0.0515857	0.185973	0.113364	0.018055	0.0706696	1
38	84.2	663.9	31.9	4.165	8.84204	6.69616	5.84769	1	0.369137	0.058525	0.150169	0.0996669	0.0204838	0.0570643	1
39	66.5	789.3	32.5	6.82	7.33107	6.199	6.70642	3	0.178092	0.12205	0.169165	0.0480849	0.0427175	0.0642828	3
40	76.4	990.5	20.3	5.335	2.8697	8.66584	5.48192	1	0.284948	0.254506	0.0695	0.0769359	0.0890771	0.02641	2
41	65.8	543.5	37.2	6.925	9.37534	0.95944	3.7174	3	0.170537	0.00497261	0.363628	0.046045	0.00174042	0.138179	3
42	88.2	880.5	21.2	3.565	5.61981	9.03304	5.48079	1	0.412311	0.176632	0.0519101	0.111324	0.0618212	0.0197258	1
43	66.5	996.8	30.7	6.82	2.68948	7.57384	5.71181	2	0.178092	0.259405	0.115904	0.0480849	0.0907918	0.0440437	2
44	56.5	873.3	19.5	8.32	5.77366	8.266	7.63201	2	0.0701576	0.172015	0.086964	0.0189425	0.0602053	0.0330463	2
45	77.6	518.2	34.3	5.155	9.37313	4.47424	5.62887	3	0.2979	0.0059679	0.233922	0.080433	0.00208877	0.0888903	3
46	76	674.6	27.9	5.395	8.75116	9.01696	7.21743	1	0.28063	0.0635438	0.0534522	0.0757702	0.0222403	0.0203118	1
47	70.6	800.4	29.7	6.205	7.15036	8.18644	7.06367	1	0.222346	0.128264	0.090963	0.0600333	0.0448924	0.034566	1
48	68.4	780	26.7	6.535	7.4766	9.37624	7.6483	1	0.1986	0.116928	0.0327639	0.053622	0.0409248	0.0124503	1
49	80.2	487.8	27.2	4.765	9.31799	9.24544	7.01141	1	0.325963	0.0191675	0.0410376	0.08801	0.00670863	0.0155943	1
50	69.1	582.7	19.5	6.43	9.30038	8.266	7.64288	1	0.206155	0.0220038	0.086964	0.0556619	0.00770133	0.0330463	1
51	73.5	579.8	33	5.77	9.30919	5.755	6.43516	3	0.253647	0.0207362	0.185973	0.0684846	0.00725767	0.0706696	3
52	56.7	872.3	21.8	8.29	5.79477	9.22924	7.92683	2	0.0723163	0.171378	0.0412423	0.0195254	0.0599824	0.0156721	2
53	82.4	425.2	32.6	4.435	9.02395	6.11236	5.84265	1	0.349709	0.0469867	0.172455	0.0944213	0.0164453	0.0655329	1
54	59.7	939.6	22.7	7.84	4.23551	9.45064	7.26461	2	0.104697	0.216708	0.0265365	0.0282681	0.0758478	0.0100839	2
55	77.2	582.6	36.4	5.215	9.30069	2.01976	4.27425	3	0.293582	0.0219601	0.324665	0.0792673	0.00768602	0.123373	3
56	56.4	997.7	33.4	8.335	2.66354	5.38036	5.50072	2	0.0690782	0.260109	0.200068	0.0186511	0.0910381	0.0760257	2
57	66.7	433.7	19	6.79	9.07813	7.981	7.68147	1	0.180251	0.0431338	0.0988382	0.0486678	0.0150968	0.0375585	1
58	77.7	999.3	33.6	5.14	2.61728	5.18656	4.41487	2	0.298979	0.261363	0.207334	0.0807244	0.091477	0.0787867	2
59	78.1	498.5	25.8	5.08	9.34393	9.54364	7.2876	1	0.303297	0.0145086	0.0188408	0.0818901	0.00507801	0.00715952	1
60	63.3	180.2	22.2	7.3	5.53697	9.33844	7.46697	2	0.143553	0.178912	0.0345345	0.0387594	0.0626192	0.0131231	2
61	76.8	330.7	19.3	5.275	8.11986	8.15524	6.78473	1	0.289265	0.0923436	0.0916221	0.0781016	0.0323203	0.0348164	1
62	84.7	480.7	20.6	4.09	9.29685	8.79796	6.45914	1	0.374534	0.0222699	0.0634079	0.101124	0.00779446	0.024095	1
63	90	555.3	21.5	3.295	9.3628	9.136	5.9867	1	0.431739	0.0100811	0.0464794	0.11657	0.0035284	0.0176622	1
64	87.6	678.6	22.3	3.655	8.71536	9.36304	6.20404	1	0.405835	0.0654358	0.0329026	0.109575	0.0229025	0.012503	1
65	69.4	599.6	33.9	6.385	9.23868	4.88776	6.33062	3	0.209393	0.0294275	0.218507	0.0565362	0.0102996	0.0830328	3
66	69	947.4	25.5	6.445	4.03663	9.58	6.64869	2	0.205076	0.222298	0.0144054	0.0553705	0.0778042	0.00547407	2
67	66.5	977.5	26	6.82	3.23381	9.514	6.45432	2	0.178092	0.244552	0.0218463	0.0480849	0.0855933	0.00830161	2
68	71.2	111.7	27.8	6.115	3.89632	9.05284	6.32429	2	0.228822	0.226042	0.0516131	0.0617818	0.0791148	0.019613	2
69	63.7	334.2	28.4	7.24	8.16322	8.82136	7.97546	2	0.147871	0.0905633	0.0630064	0.0399251	0.0316972	0.0239424	2
70	61.8	323.1	29.1	7.525	8.0231	8.50216	7.97015	2	0.127363	0.0962404	0.0774678	0.034388	0.0336841	0.0294378	2
71	76.5	656.9	30.1	5.32	8.89765	7.95436	6.89331	1	0.286027	0.0552732	0.100561	0.0772273	0.0193456	0.0382133	1
72	77.3	854	31.6	5.2	6.1702	6.93016	5.98068	1	0.294662	0.159911	0.141143	0.0795587	0.0559688	0.0536344	1
73	67.2	454.3	15.3	6.715	9.19086	5.03284	6.52478	3	0.185648	0.0339075	0.212595	0.0501249	0.0118676	0.0807859	3
74	64.1	675.4	32	7.18	8.74408	6.616	7.30088	3	0.152188	0.0639215	0.153247	0.0410908	0.0223725	0.058234	3
75	65.6	856.7	27.3	6.955	6.11612	9.21604	7.45152	2	0.168378	0.161581	0.0427482	0.0454621	0.0565533	0.0162443	2
76	88.3	645.4	28.5	3.55	8.98242	8.779	6.03368	1	0.41339	0.0499816	0.0649922	0.111615	0.0174936	0.024697	1
77	76.3	450.3	36.6	5.35	9.17103	1.76116	4.10482	3	0.283868	0.0356877	0.334177	0.0766445	0.0124907	0.126987	3
78	84.4	650.5	36.3	4.135	8.94584	2.14744	3.92613	1	0.371296	0.0523208	0.319966	0.10025	0.0183123	0.121587	3
79	70.5	880.6	21.8	6.22	5.61765	9.22924	6.97586	2	0.221266	0.176697	0.0412423	0.0597419	0.0618438	0.0156721	2
80	67.6	985.1	18.8	6.655	3.02222	7.85944	5.8828	2	0.189965	0.250346	0.103805	0.0512906	0.0876211	0.0394458	2

## Sheet: Sheet3
	Acoustic environment dB(A)	Optical environment lx	Thermal environment ℃	Acoustic environment comfort evaluation value	Optical environment comfort evaluation value	Thermal environment comfort evaluation value	Model comprehensive evaluation value	Adjustment strategy identified by experts	Calculate OS distance						Adjustment strategy identified by OSD	Adjustment strategy identified by SVM	Adjustment strategy identified by XGBoost	Adjustment strategy identified by Random Forest
1	82.5	450.3	30	4.42	9.17103	8.014	6.43844	1	0.350788	0.0356877	0.0981153	0.0947127	0.0124907	0.0372838	1	3	1	1
2	72.3	868.9	35.4	5.95	5.8661	3.24796	4.79823	3	0.240694	0.169221	0.279383	0.0649875	0.0592274	0.106166	3	2	3	3
3	70.5	880.6	21.8	6.22	5.61765	9.22924	6.97586	2	0.221266	0.176697	0.0412423	0.0597419	0.0618438	0.0156721	2	1	2	1
4	67.6	985.1	18.8	6.655	3.02222	7.85944	5.8828	2	0.189965	0.250346	0.103805	0.0512906	0.0876211	0.0394458	2	2	2	2
5	68.2	674.6	33	6.565	8.75116	5.755	6.69776	3	0.196441	0.0635438	0.185973	0.0530391	0.0222403	0.0706696	3	3	3	3
6	66.4	1011.7	27.6	6.835	2.25346	9.12136	5.85823	2	0.177013	0.27119	0.0480026	0.0477935	0.0949164	0.018241	2	2	2	2
7	63.5	698.5	12	7.27	8.52253	1.156	3.96196	3	0.145712	0.0749846	0.356013	0.0393422	0.0262446	0.135285	3	1	3	2
8	77.2	582.6	36.4	5.215	9.30069	2.01976	4.27425	3	0.293582	0.0219601	0.324665	0.0792673	0.00768602	0.123373	3	3	3	3
9	79.6	654.3	30.8	4.855	8.91754	7.50664	6.50372	1	0.319487	0.0540715	0.118575	0.0862614	0.018925	0.0450585	1	3	1	1
10	59.6	939.9	26.8	7.855	4.22793	9.35224	7.24088	2	0.103617	0.216922	0.0343834	0.0279767	0.0759226	0.0130657	2	2	2	2
11	77.6	518.2	34.3	5.155	9.37313	4.47424	5.62887	3	0.2979	0.0059679	0.233922	0.080433	0.00208877	0.0888903	3	3	3	3
12	64.8	495.4	37	7.075	9.33714	1.231	4.08907	3	0.159743	0.0158566	0.353658	0.0431307	0.0055498	0.13439	3	3	3	3
13	69.4	599.6	33.9	6.385	9.23868	4.88776	6.33062	3	0.209393	0.0294275	0.218507	0.0565362	0.0102996	0.0830328	3	3	3	3
14	79.5	999.3	30	4.87	2.61728	8.014	5.02592	1	0.318407	0.261363	0.0981153	0.08597	0.091477	0.0372838	2	2	2	2
15	84.2	422.7	22.6	4.165	9.00717	9.43036	6.62031	1	0.369137	0.0481255	0.0281052	0.0996669	0.0168439	0.01068	1	3	1	1
16	78.2	860.3	33.8	5.065	6.0433	4.98844	5.24692	2	0.304376	0.163819	0.214746	0.0821815	0.0573367	0.0816035	2	1	3	3
17	69.1	949.4	23.5	6.43	3.98503	9.574	6.62111	2	0.206155	0.223743	0.0144351	0.0556619	0.07831	0.00548534	2	2	2	2
18	76.5	877.5	26.4	5.32	5.68431	9.44176	6.60279	1	0.286027	0.174702	0.0280005	0.0772273	0.0611456	0.0106402	1	1	1	1
19	71.5	211.7	27.8	6.07	6.19378	9.05284	7.01397	2	0.23206	0.158987	0.0516131	0.0626561	0.0556454	0.019613	2	3	2	2
20	67.9	985.1	18.8	6.61	3.02222	7.85944	5.86606	2	0.193203	0.250346	0.103805	0.0521649	0.0876211	0.0394458	2	2	2	2
21	62.6	939.9	26.8	7.405	4.22793	9.35224	7.06367	2	0.135998	0.216922	0.0343834	0.0367194	0.0759226	0.0130657	2	2	2	2
22	74.5	799.3	30	5.62	7.1686	8.014	6.72956	1	0.26444	0.127643	0.0981153	0.0713988	0.0446751	0.0372838	1	1	1	1
23	64	927.9	31.2	7.195	4.52675	7.22704	6.47769	2	0.151109	0.208458	0.129589	0.0407993	0.0729601	0.0492439	2	2	2	2
24	64.2	931.1	34.5	7.165	4.44794	4.261	5.35299	2	0.153267	0.210698	0.241851	0.0413822	0.0737444	0.0919035	3	2	3	2
25	78.3	856.8	12.4	5.05	6.11411	1.68856	3.59641	3	0.305455	0.161643	0.336438	0.0824729	0.056575	0.127846	3	1	3	1
26	76.2	1004.2	36.6	5.365	2.47465	1.76116	3.04059	3	0.282789	0.265223	0.334177	0.076353	0.092828	0.126987	3	2	2	3
27	82.6	908.2	36.9	4.405	4.99796	1.36516	3.0095	3	0.351867	0.194923	0.348731	0.0950042	0.0682232	0.132518	3	1	3	3
28	67.4	444.9	36.4	6.685	9.14268	2.01976	4.72546	3	0.187806	0.0380993	0.324665	0.0507077	0.0133348	0.123373	3	3	3	3
29	77.5	644.2	34.8	5.17	8.9908	3.93304	5.33574	3	0.296821	0.0494329	0.254025	0.0801415	0.0173015	0.0965296	3	3	3	3
30	56	489.1	33.1	8.395	9.32152	5.66296	7.49266	3	0.0647608	0.0186005	0.189442	0.0174854	0.00651017	0.0719879	3	3	3	2
Accuracy															0.933333	0.6	0.866667	0.8
